# Supplementary material for: Extended Sentinel Monitoring of Helicoverpa zea Resistance to Cry and Vip3Aa Toxins in Bt Sweet Corn: Assessing Changes in Phenotypic and Allele Frequencies of Resistance
Source: MDPI journal article supplement (doi:10.3390/insects14070577), 2023-06-25
Supplement: s1 [file s1]

Table S2. Percentage of non-Bt ears damaged by *H. zea* and the estimated phenotypic frequency of resistance for each Bt toxin per sentinel trial during each year of the 2020-2022 sweet corn sentinel monitoring network. Data were averaged over the non-Bt hybrids ('Providence' and 'Obsession I') and listed according to the highest to lowest means of *H. zea* damage by year. PFR is the ratio of mean density of surviving *H. zea* larvae per Bt ear relative to the mean surviving larval density per non-Bt ear.

| Year | Trial location   | % non-Bt ears damaged by <i>H. zea</i> | Phenotypic Frequency of Resistance (PFR) |                       |        |
|------|------------------|----------------------------------------|------------------------------------------|-----------------------|--------|
|      |                  |                                        | Cry1Ab                                   | Cry1A.105/<br>Cry2Ab2 | VipAa  |
| 2020 | Salisbury, MD    | 100.0                                  | 0.61                                     | 0.73                  | 0.0    |
|      | Queenstown, MD   | 100.0                                  | 0.79                                     | 0.65                  | 0.0    |
|      | Brenton, AL      | 100.0                                  | 0.65                                     | 0.52                  | 0.0    |
|      | Suffolk, VA      | 100.0                                  | NA                                       | 0.91                  | 0.0    |
|      | Plains, GA       | 100.0                                  | NA                                       | NA                    | 0.0    |
|      | Stoneville1, MS  | 100.0                                  | 1.07                                     | 1.06                  | 0.0    |
|      | Lubbock, TX      | 98.8                                   | 1.10                                     | NA                    | 0.0    |
|      | Beltsville3, MD  | 98.0                                   | 1.62                                     | 0.68                  | 0.0    |
|      | Ames, IA         | 98.0                                   | 1.98                                     | NA                    | 0.0    |
|      | RAREC, NJ        | 98.0                                   | 0.79                                     | 0.91                  | 0.0    |
|      | Griffin, GA      | 98.0                                   | 1.00                                     | 0.98                  | 0.0    |
|      | Stoneville2, MS  | 98.0                                   | 1.19                                     | NA                    | 0.0559 |
|      | Jackson City, NC | 98.0                                   | 0.94                                     | 1.09                  | 0.0    |
|      | Plymouth, NC     | 97.0                                   | NA                                       | 0.79                  | 0.0    |
|      | Abingdon, VA     | 97.0                                   | 0.91                                     | 1.06                  | 0.0    |
|      | Beltsville4, MD  | 96.1                                   | 0.53                                     | 1.16                  | 0.0    |
|      | Riverhead, NY    | 95.5                                   | 1.18                                     | 0.87                  | 0.0051 |
|      | Painter, VA      | 94.3                                   | 0.75                                     | 1.26                  | 0.0    |
|      | Champaign, IL    | 94.0                                   | 1.11                                     | 1.47                  | 0.0    |
|      | Catawba, VA      | 92.0                                   | 1.43                                     | NA                    | 0.0    |
|      | Keedysville, MD  | 90.0                                   | 0.61                                     | 0.70                  | 0.0    |
|      | Tallassee, Al    | 89.5                                   | 0.92                                     | 0.51                  | 0.0    |
|      | Jay, FL          | 89.0                                   | 0.98                                     | 1.03                  | 0.0    |
|      | Whitethome, VA   | 88.1                                   | NA                                       | NA                    | 0.0    |
|      | Clay Center, NE  | 87.7                                   | 0.92                                     | 0.86                  | 0.0    |
|      | Pittstown, NJ    | 86.5                                   | 1.05                                     | NA                    | 0.0    |

|      |                   |       |      |      |        |
|------|-------------------|-------|------|------|--------|
|      | Florence, SC      | 85.0  | 0.88 | 0.55 | 0.0    |
|      | Stoneville3, MS   | 85.0  | 1.11 | 1.03 | 0.0    |
|      | Georgetown, DE    | 84.4  | 0.86 | NA   | 0.0    |
|      | Rosemont, MN      | 79.0  | 0.83 | NA   | 0.0    |
|      | Queenstown, MD    | 70.5  | 0.74 | 0.79 | 0.0    |
|      | Rock Springs, PA  | 64.5  | 0.41 | 0.50 | 0.0    |
|      | Berwick, NS       | 39.0  | NA   | NA   | NA     |
|      | Lafayette, IN     | 36.0  | 0.89 | NA   | NA     |
|      | Freetown, PEI     | 18.4  | NA   | NA   | NA     |
|      | Arlington, WI     | 16.5  | NA   | NA   | NA     |
|      | Ridgetown, ON     | 15.5  | NA   | NA   | NA     |
|      | S. Charleston, OH | 7.5   | NA   | NA   | NA     |
|      | Frankenmuth, MI   | 0.0   | NA   | NA   | NA     |
|      | Ridgetown, ON     | 0.0   | NA   | NA   | NA     |
|      | St. Mathieude, QC | 0.0   | NA   | NA   | NA     |
| 2021 | Beltsville1, MD   | 100.0 | 1.34 | 0.97 | 0.0031 |
|      | Beltsville2, MD   | 100.0 | 1.06 | 0.74 | 0.0056 |
|      | Queenstown1, MD   | 100.0 | 1.67 | 1.11 | 0.0    |
|      | Queenstown2, MD   | 100.0 | 1.03 | 1.07 | 0.0    |
|      | Stoneville2, MS   | 100.0 | 1.02 | 0.91 | 0.0    |
|      | Stoneville3, MS   | 100.0 | 1.01 | 0.71 | 0.0    |
|      | Lubbock, TX       | 100.0 | NA   | NA   | 0.0    |
|      | Plymouth2, NC     | 100.0 | NA   | NA   | 0.0    |
|      | Lafayette, IN     | 99.5  | 0.90 | 0.62 | 0.0127 |
|      | S. Charleston, OH | 99.0  | 0.91 | NA   | 0.0046 |
|      | Champaign, IL     | 99.0  | 1.05 | 1.11 | 0.0    |
|      | Suffolk, VA       | 99.0  | NA   | NA   | 0.0    |
|      | Florence, SC      | 98.0  | 0.75 | 0.65 | 0.0    |
|      | Painter, VA       | 97.5  | 1.04 | 0.93 | 0.0234 |
|      | RAREC, NJ         | 96.0  | 1.00 | 1.03 | 0.0    |
|      | Ames, IA          | 96.0  | 1.00 | 0.86 | 0.0023 |
|      | Georgetown, DE    | 94.5  | 1.02 | 1.39 | 0.0    |

|  |                     |      |      |      |        |
|--|---------------------|------|------|------|--------|
|  | Rosemount, MN       | 93.0 | 0.90 | 0.94 | 0.0    |
|  | Griffin, GA         | 91.5 | 1.19 | NA   | 0.0043 |
|  | Red Rock, AZ        | 90.2 | NA   | NA   | 0.0    |
|  | Jay, FL             | 87.0 | 1.07 | 1.00 | 0.0595 |
|  | Wooster, OH         | 86.0 | NA   | NA   | 0.0    |
|  | Brewton, AL         | 85.7 | 1.09 | 0.63 | 0.0063 |
|  | Pittstown, NJ       | 85.0 | 0.93 | NA   | 0.0    |
|  | Salisbury, MD       | 83.9 | 0.83 | 0.52 | 0.0    |
|  | Shorter, AL         | 82.3 | 1.11 | 0.59 | 0.0    |
|  | Corpus Christi2, TX | 81.8 | 1.19 | 2.22 | 0.0677 |
|  | Stoneville1, MS     | 79.0 | 0.59 | 0.97 | 0.0172 |
|  | Clay Center, NE     | 78.7 | 1.14 | 0.69 | 0.0098 |
|  | Abingdin, VA        | 78.5 | NA   | NA   | 0.0    |
|  | Winnsboro, LA       | 70.5 | NA   | NA   | 0.0    |
|  | Keedysville, MD     | 67.5 | 0.54 | NA   | 0.0    |
|  | Corpus Christi1, TX | 66.4 | 0.28 | 1.21 | 0.0681 |
|  | Rock Springs, PA    | 64.0 | 0.87 | 0.57 | 0.0306 |
|  | Lewiston, NC        | 61.4 | 0.89 | NA   | 0.0    |
|  | Jackson Spr, NC     | 54.9 | 0.87 | 0.57 | 0.0306 |
|  | Winnsboro, LA       | 42.0 | NA   | NA   | 0.0    |
|  | Whitehome, VA       | 40.3 | NA   | NA   | 0.0    |
|  | Geneva, NY          | 32.0 | NA   | NA   | NA     |
|  | Cambridge1, NS      | 32.0 | NA   | NA   | NA     |
|  | Durham, NH          | 30.0 | NA   | NA   | NA     |
|  | Cambridge2, NS      | 26.0 | NA   | NA   | NA     |
|  | Arlington, WI       | 22.0 | NA   | NA   | NA     |
|  | Emerald, PEI        | 14.0 | NA   | NA   | NA     |
|  | Plymouth1, NC       | 11.9 | NA   | NA   | NA     |
|  | Plains, GA          | 6.5  | NA   | NA   | NA     |
|  | Ridgetown, ON       | 4.0  | NA   | NA   | NA     |
|  | Frankenmuth, MI     | 3.0  | NA   | 0.0  | NA     |

|      |                  |       |      |      |        |
|------|------------------|-------|------|------|--------|
|      | N. Platte, NE    | 1.9   | NA   | NA   | NA     |
|      | Ridgetown, ON    | 1.0   | NA   | NA   | NA     |
|      | St. Mathieu, QC  | 0.0   | NA   | NA   | NA     |
|      | Winchester, ON   | 0.0   | NA   | NA   | NA     |
| 2022 | Beltsville2, MD  | 100.0 | 1.30 | 0.67 | 0.0    |
|      | Queenstown, MD   | 100.0 | 0.96 | 0.77 | 0.0    |
|      | Salisbury, MD    | 100.0 | 1.11 | 0.92 | 0.0    |
|      | Champaign, IL    | 100.0 | 1.21 | 1.42 | 0.0    |
|      | Florence, SC     | 100.0 | 1.09 | 0.84 | 0.0    |
|      | Stoneville, MS   | 100.0 | 1.19 | 0.79 | 0.0    |
|      | Stoneville, MS   | 100.0 | 0.81 | 1.04 | 0.0    |
|      | Jackson Spr1, NC | 100.0 | 1.38 | 0.93 | 0.0423 |
|      | Suffolk, VA      | 100.0 | 1.01 | 0.96 | 0.0053 |
|      | RAREC, NJ        | 100.0 | NA   | NA   | 0.0    |
|      | Riverhead, NY    | 99.5  | 1.01 | 0.96 | 0.0053 |
|      | Abington, VA     | 99.5  | 1.20 | 0.82 | 0.0049 |
|      | Beltsville1, MD  | 99.0  | 1.42 | 0.69 | 0.0    |
|      | Painter, VA      | 99.0  | 0.87 | 0.83 | 0.0    |
|      | Whitethome, VA   | 99.0  | 0.95 | 0.77 | 0.0029 |
|      | Lubbock, TX      | 99.0  | 1.50 | 1.40 | 0.0    |
|      | Pittstown, NJ    | 97.0  | 0.90 | 1.00 | 0.0    |
|      | Georgetown, DE   | 96.0  | 0.77 | 0.59 | 0.0    |
|      | Winnsboro, LA    | 95.5  | 1.06 | 0.61 | 0.0    |
|      | Griffin, GA      | 95.0  | 0.91 | 0.79 | 0.0    |
|      | Brewton, AL      | 95.0  | 0.84 | 0.37 | 0.0    |
|      | Ames, IA         | 94.1  | 1.19 | 0.84 | 0.0    |
|      | Geneva, NY       | 94.0  | 0.76 | 0.78 | 0.0    |
|      | Dean Lee, LA     | 94.0  | 0.92 | 0.41 | 0.0    |
|      | Charleston, SC   | 94.0  | NA   | NA   | 0.0    |
|      | Keedysville, MD  | 92.2  | 1.02 | 0.73 | 0.0086 |

|  |                    |      |      |      |        |
|--|--------------------|------|------|------|--------|
|  | Stoneville, MS     | 91.0 | 0.97 | 0.93 | 0.0    |
|  | Newark, DE         | 90.6 | 0.91 | 0.85 | 0.0074 |
|  | Plains, GA         | 90.5 | 0.91 | 0.94 | 0.0    |
|  | TPAC, IN           | 90.5 | 0.71 | 0.60 | 0.0054 |
|  | Plymouth, NC       | 88.0 | 1.07 | 0.67 | 0.0    |
|  | Corpus Christi, TX | 87.9 | 1.03 | 0.73 | 0.0    |
|  | Jackson Spr2, NC   | 87.2 | 1.08 | 1.11 | 0.0    |
|  | Maricopa, AZ       | 87.0 | NA   | NA   | 0.0    |
|  | Red Rock, AZ       | 86.7 | NA   | NA   | 0.0    |
|  | Shorter, Al        | 81.3 | 0.46 | NA   | 0.0149 |
|  | Westaco, TX        | 79.3 | NA   | NA   | 0.0    |
|  | BREC, MD           | 78.9 | NA   | NA   | 0.0    |
|  | Brewton, AL        | 67.0 | 1.09 | NA   | 0.0    |
|  | Harvard, NE        | 64.9 | 1.10 | 0.74 | 0.0    |
|  | BREC, MD           | 64.0 | NA   | NA   | 0.0    |
|  | Kentville, NS      | 46.0 | NA   | NA   | NA     |
|  | S. Charleston, OH  | 45.0 | NA   | NA   | NA     |
|  | Lancaster, PA      | 34.0 | NA   | NA   | NA     |
|  | Wooster, OH        | 33.0 | NA   | NA   | NA     |
|  | Plymouth, NC       | 23.0 | NA   | NA   | NA     |
|  | Sussex, NB         | 17.0 | NA   | NA   | NA     |
|  | Alburgh, VT        | 16.0 | NA   | NA   | NA     |
|  | Ridgetown, ON      | 13.0 | NA   | NA   | NA     |
|  | Brookings, SD      | 5.0  | NA   | NA   | NA     |
|  | Frankenmuth, MI    | 5.0  | NA   | NA   | NA     |
|  | St. Mathieu, QC    | 0.0  | NA   | NA   | NA     |
|  | Frankenmuth, MI    | 0.0  | NA   | NA   | NA     |

NA = data not available due to low *H. zea* infestation and/or sampling timed too early to estimate the maximum number of surviving larvae.
