# Supplementary material for: Extended Sentinel Monitoring of Helicoverpa zea Resistance to Cry and Vip3Aa Toxins in Bt Sweet Corn: Assessing Changes in Phenotypic and Allele Frequencies of Resistance
Source: MDPI journal article supplement (doi:10.3390/insects14070577), 2023-06-25
Supplement: s1 [file s1]

Table S1. Percentages of non-Bt ears damaged by *H. zea*, *O. nubilalis*, *S. frugiperda* and *S. albicosta* at each sentinel trial during each year of the sweet corn sentinel monitoring network. Data were averaged over the non-Bt hybrids ('Providence' and 'Obsession I') and listed according to the highest to lowest means of *H. zea* damage.

| Year | Trial location   | <i>H. zea</i> | <i>O. nubilalis</i> | <i>S. frugiperda</i> | <i>S. albicosta</i> |
|------|------------------|---------------|---------------------|----------------------|---------------------|
| 2020 | Salisbury, MD    | 100.0         | 0.0                 | 0.0                  | 0.0                 |
|      | Queenstown, MD   | 100.0         | 2.0                 | 0.0                  | 0.0                 |
|      | Brenton, AL      | 100.0         | 0.0                 | 0.0                  | 0.0                 |
|      | Suffolk, VA      | 100.0         | 0.0                 | 1.0                  | 0.0                 |
|      | Plains, GA       | 100.0         | 0.0                 | 3.0                  | 0.0                 |
|      | Stoneville1, MS  | 100.0         | 0.0                 | 0.0                  | 0.0                 |
|      | Lubbock, TX      | 98.8          | 1.3                 | 3.3                  | 0.0                 |
|      | Beltsville3, MD  | 98.0          | 0.0                 | 2.0                  | 0.0                 |
|      | Ames, IA         | 98.0          | 0.0                 | 5.0                  | 0.0                 |
|      | RAREC, NJ        | 98.0          | 0.0                 | 0.0                  | 0.0                 |
|      | Griffin, GA      | 98.0          | 0.0                 | 0.0                  | 0.0                 |
|      | Stoneville2, MS  | 98.0          | 0.0                 | 0.0                  | 0.0                 |
|      | Jackson City, NC | 98.0          | 0.0                 | 0.0                  | 0.0                 |
|      | Plymouth, NC     | 97.0          | 0.0                 | 1.0                  | 0.0                 |
|      | Abingdon, VA     | 97.0          | 0.0                 | 0.0                  | 0.0                 |
|      | Beltsville4, MD  | 96.1          | 0.0                 | 0.0                  | 0.0                 |
|      | Riverhead, NY    | 95.5          | 5.5                 | 0.0                  | 0.0                 |
|      | Painter, VA      | 94.3          | 2.0                 | 45.0                 | 0.0                 |
|      | Champaign, IL    | 94.0          | 3.0                 | 4.0                  | 0.0                 |
|      | Catawba, VA      | 92.0          | 0.0                 | 0.0                  | 0.0                 |
|      | Keedysville, MD  | 90.0          | 2.0                 | 0.0                  | 0.0                 |
|      | Tallassee, Al    | 89.5          | 0.0                 | 0.0                  | 0.0                 |
|      | Jay, FL          | 89.0          | 0.0                 | 0.0                  | 0.0                 |
|      | Whitethome, VA   | 88.1          | 0.0                 | 0.0                  | 0.0                 |
|      | Clay Center, NE  | 87.7          | 0.0                 | 0.0                  | 0.0                 |
|      | Pittstown, NJ    | 86.5          | 3.5                 | 0.0                  | 0.0                 |
|      | Florence, SC     | 85.0          | 0.0                 | 53.0                 | 0.0                 |
|      | Stoneville3, MS  | 85.0          | 0.0                 | 0.0                  | 0.0                 |
|      | Georgetown, DE   | 84.4          | 0.6                 | 0.0                  | 0.0                 |

|      |                   |       |      |      |     |
|------|-------------------|-------|------|------|-----|
|      | Rosemont, MN      | 79.0  | 0.0  | 0.0  | 0.0 |
|      | Queenstown, MD    | 70.5  | 0.0  | 0.0  | 0.0 |
|      | Rock Springs, PA  | 64.5  | 18.0 | 1.0  | 0.0 |
|      | Berwick, NS       | 39.0  | 2.0  | 0.0  | 8.0 |
|      | Lafayette, IN     | 36.0  | 0.0  | 11.0 | 0.0 |
|      | Freetown, PEI     | 18.4  | 0.0  | 1.0  | 0.0 |
|      | Arlington, WI     | 16.5  | 0.0  | 0.0  | 0.0 |
|      | Ridgetown, ON     | 15.5  | 0.0  | 1.0  | 0.0 |
|      | S. Charleston, OH | 7.5   | 0.0  | 6.5  | 0.0 |
|      | Frankenmuth, MI   | 0.0   | 0.0  | 0.0  | 2.5 |
|      | Ridgetown, ON     | 0.0   | 0.0  | 0.0  | 1.0 |
|      | St. Mathieude, QC | 0.0   | 0.0  | 0.0  | 5.5 |
| 2021 | Beltsville1, MD   | 100.0 | 0.0  | 0.0  | 0.0 |
|      | Beltsville2, MD   | 100.0 | 0.0  | 0.0  | 0.0 |
|      | Queenstown1, MD   | 100.0 | 0.0  | 0.0  | 0.0 |
|      | Queenstown2, MD   | 100.0 | 0.0  | 0.0  | 0.0 |
|      | Stoneville2, MS   | 100.0 | 0.0  | 0.0  | 0.0 |
|      | Stoneville3, MS   | 100.0 | 0.0  | 3.0  | 0.0 |
|      | Lubbock, TX       | 100.0 | 0.0  | 16.0 | 0.0 |
|      | Plymouth2, NC     | 100.0 | 0.0  | 0.0  | 0.0 |
|      | Lafayette, IN     | 99.5  | 4.5  | 0.0  | 0.0 |
|      | S. Charleston, OH | 99.0  | 0.0  | 0.0  | 0.0 |
|      | Champaign, IL     | 99.0  | 0.0  | 0.0  | 0.0 |
|      | Suffolk, VA       | 99.0  | 0.0  | 0.0  | 0.0 |
|      | Florence, SC      | 98.0  | 0.0  | 3.0  | 0.0 |
|      | Painter, VA       | 97.5  | 8.5  | 5.5  | 0.0 |
|      | RAREC, NJ         | 96.0  | 0.0  | 2.0  | 0.0 |
|      | Ames, IA          | 96.0  | 0.0  | 0.0  | 0.0 |
|      | Georgetown, DE    | 94.5  | 0.0  | 0.0  | 0.0 |
|      | Rosemount, MN     | 93.0  | 0.0  | 0.0  | 0.0 |
|      | Griffin, GA       | 91.5  | 0.0  | 0.0  | 0.0 |
|      | Red Rock, AZ      | 90.2  | 0.0  | 3.9  | 0.0 |

|  |                     |      |      |      |      |
|--|---------------------|------|------|------|------|
|  | Jay, FL             | 87.0 | 0.0  | 4.7  | 0.0  |
|  | Wooster, OH         | 86.0 | 2.0  | 0.0  | 0.0  |
|  | Brewton, AL         | 85.7 | 0.0  | 0.0  | 0.0  |
|  | Pittstown, NJ       | 85.0 | 5.0  | 0.0  | 0.0  |
|  | Salisbury, MD       | 83.9 | 0.0  | 0.0  | 0.0  |
|  | Shorter, AL         | 82.3 | 0.0  | 0.0  | 0.0  |
|  | Corpus Christi2, TX | 81.8 | 0.0  | 20.4 | 0.0  |
|  | Stoneville1, MS     | 79.0 | 0.0  | 0.0  | 0.0  |
|  | Clay Center, NE     | 78.7 | 0.0  | 0.0  | 0.0  |
|  | Abingdin, VA        | 78.5 | 0.0  | 0.0  | 0.0  |
|  | Winnsboro, LA       | 70.5 | 0.0  | 0.0  | 0.0  |
|  | Keedysville, MD     | 67.5 | 4.3  | 0.0  | 0.0  |
|  | Corpus Christi1, TX | 66.4 | 0.0  | 8.2  | 0.0  |
|  | Rock Springs, PA    | 64.0 | 12.0 | 0.0  | 0.0  |
|  | Lewiston, NC        | 61.4 | 0.0  | 0.0  | 0.0  |
|  | Jackson Spr, NC     | 54.9 | 0.0  | 0.0  | 0.0  |
|  | Winnsboro, LA       | 42.0 | 0.0  | 0.0  | 0.0  |
|  | Whitehome, VA       | 40.3 | 0.0  | 0.0  | 0.0  |
|  | Geneva, NY          | 32.0 | 0.0  | 0.0  | 0.0  |
|  | Cambridge1, NS      | 32.0 | 0.0  | 0.0  | 0.0  |
|  | Durham, NH          | 30.0 | 0.0  | 0.0  | 0.0  |
|  | Cambridge2, NS      | 26.0 | 0.0  | 0.0  | 0.0  |
|  | Arlington, WI       | 22.0 | 0.0  | 0.0  | 0.0  |
|  | Emerald, PEI        | 14.0 | 0.0  | 3.0  | 0.0  |
|  | Plymouth1, NC       | 11.9 | 0.0  | 0.0  | 0.0  |
|  | Plains, GA          | 6.5  | 0.0  | 0.0  | 0.0  |
|  | Ridgetown, ON       | 4.0  | 0.0  | 1.5  | 59.5 |
|  | Frankenmuth, MI     | 3.0  | 0.8  | 0.0  | 0.0  |
|  | N. Platte, NE       | 1.9  | 0.0  | 0.0  | 27.1 |
|  | Ridgetown, ON       | 1.0  | 0.0  | 1.0  | 14.0 |
|  | St. Mathieu, QC     | 0.0  | 0.0  | 0.0  | 5.5  |

|      |                  |       |      |      |     |
|------|------------------|-------|------|------|-----|
|      | Winchester, ON   | 0.0   | 27.5 | 5.0  | 0.0 |
| 2022 | Beltsville2, MD  | 100.0 | 0.0  | 0.0  | 0.0 |
|      | Queenstown, MD   | 100.0 | 0.0  | 0.0  | 0.0 |
|      | Salisbury, MD    | 100.0 | 0.0  | 0.0  | 0.0 |
|      | Champaign, IL    | 100.0 | 0.0  | 1.0  | 0.0 |
|      | Florence, SC     | 100.0 | 0.0  | 0.0  | 0.0 |
|      | Stoneville, MS   | 100.0 | 0.0  | 0.0  | 0.0 |
|      | Stoneville, MS   | 100.0 | 0.0  | 0.0  | 0.0 |
|      | Jackson Spr1, NC | 100.0 | 0.0  | 0.0  | 0.0 |
|      | Suffolk, VA      | 100.0 | 0.0  | 0.0  | 0.0 |
|      | RAREC, NJ        | 100.0 | 0.0  | 0.0  | 0.0 |
|      | Riverhead, NY    | 99.5  | 2.9  | 0.0  | 0.0 |
|      | Abington, VA     | 99.5  | 0.0  | 0.0  | 0.0 |
|      | Beltsville1, MD  | 99.0  | 0.0  | 0.0  | 0.0 |
|      | Painter, VA      | 99.0  | 1.0  | 9.0  | 0.0 |
|      | Whitethome, VA   | 99.0  | 0.0  | 2.5  | 0.0 |
|      | Lubbock, TX      | 99.0  | 0.0  | 20.0 | 0.0 |
|      | Pittstown, NJ    | 97.0  | 0.0  | 0.0  | 0.0 |
|      | Georgetown, DE   | 96.0  | 0.0  | 0.0  | 0.0 |
|      | Winnsboro, LA    | 95.5  | 0.0  | 0.0  | 0.0 |
|      | Griffin, GA      | 95.0  | 0.0  | 0.0  | 0.0 |
|      | Brewton, AL      | 95.0  | 0.0  | 2.7  | 0.0 |
|      | Ames, IA         | 94.1  | 0.0  | 0.0  | 0.0 |
|      | Geneva, NY       | 94.0  | 10.0 | 2.0  | 0.0 |
|      | Dean Lee, LA     | 94.0  | 0.0  | 1.0  | 0.0 |
|      | Charleston, SC   | 94.0  | 0.0  | 0.0  | 0.0 |
|      | Keedysville, MD  | 92.2  | 2.0  | 0.0  | 0.0 |
|      | Stoneville, MS   | 91.0  | 0.0  | 0.0  | 0.0 |
|      | Newark, DE       | 90.6  | 0.0  | 0.0  | 0.0 |
|      | Plains, GA       | 90.5  | 0.0  | 0.0  | 0.0 |

|  |                    |      |     |     |      |
|--|--------------------|------|-----|-----|------|
|  | TPAC, IN           | 90.5 | 0.0 | 0.0 | 0.0  |
|  | Plymouth, NC       | 88.0 | 0.0 | 0.0 | 0.0  |
|  | Corpus Christi, TX | 87.9 | 0.0 | 5.5 | 0.0  |
|  | Jackson Spr2, NC   | 87.2 | 0.0 | 0.0 | 0.0  |
|  | Maricopa, AZ       | 87.0 | 0.0 | 5.7 | 0.0  |
|  | Red Rock, AZ       | 86.7 | 0.0 | 5.0 | 0.0  |
|  | Shorter, Al        | 81.3 | 0.0 | 0.0 | 0.0  |
|  | Westaco, TX        | 79.3 | 0.0 | 0.0 | 0.0  |
|  | BREC, MD           | 78.9 | 0.0 | 0.0 | 0.0  |
|  | Brewton, AL        | 67.0 | 0.0 | 6.6 | 0.0  |
|  | Harvard, NE        | 64.9 | 0.0 | 0.0 | 14.5 |
|  | BREC, MD           | 64.0 | 0.0 | 0.0 | 0.0  |
|  | Kentville, NS      | 46.0 | 4.0 | 0.0 | 21.0 |
|  | S. Charleston, OH  | 45.0 | 3.0 | 0.0 | 0.0  |
|  | Lancaster, PA      | 34.0 | 1.0 | 0.0 | 0.0  |
|  | Wooster, OH        | 33.0 | 2.0 | 0.0 | 0.0  |
|  | Plymouth, NC       | 23.0 | 0.0 | 0.0 | 0.0  |
|  | Sussex, NB         | 17.0 | 0.0 | 1.0 | 26.0 |
|  | Alburgh, VT        | 16.0 | 0.5 | 0.0 | 0.0  |
|  | Ridgetown, ON      | 13.0 | 1.0 | 4.0 | 1.0  |
|  | Brookings, SD      | 5.0  | 0.0 | 0.0 | 0.0  |
|  | Frankenmuth, MI    | 5.0  | 3.5 | 2.5 | 0.0  |
|  | St. Mathieu, QC    | 0.0  | 4.5 | 0.0 | 24.5 |
|  | Frankenmuth, MI    | 0.0  | 0.0 | 0.0 | 2.0  |
